# Supplementary material for: A charge-decorated porous framework with polar pores and open O donor sites for CO2/CH4 and C2H2/C2H4 separations
Source: Royal Society of Chemistry journal article supplement (doi:10.1039/d2dt01961b), 2022-01-01
Supplement: d2dt01961b1.pdf [file d2dt01961b1.pdf]

## A charge-decorated porous framework with polar pores and open O donor sites for CO<sub>2</sub>/CH<sub>4</sub> and C<sub>2</sub>H<sub>2</sub>/C<sub>2</sub>H<sub>4</sub> separations

Bin Tan,<sup>a</sup> Xing-Wu Liu,<sup>b</sup> Hao-Wang,<sup>c</sup> Guo-Yu Yang<sup>a</sup> and Jie Zhang<sup>\*a</sup>

<sup>a</sup>MOE Key Laboratory of Cluster Science, Beijing Key Laboratory of Photoelectronic/Electrophotonic Conversion Materials, School of Chemistry and Chemical Engineering, Beijing Institute of Technology, Beijing 102488, P. R. China

E-mail: zhangjie68@bit.edu.cn

<sup>b</sup>Synfuels China Technology Co.Ltd., Beijing, 101407, P. R. China

<sup>c</sup>Hoffmann Institute of Advanced Materials, Shenzhen Polytechnic, 7098 Liuxian Boulevard, Nanshan District, Shenzhen 518055, P. R. China

### Experiment Section

**Materials and Methods.** All reagents and chemicals were purchased from commercial sources and used without further purification. Powder X-ray diffraction (PXRD) patterns were recorded in the angular range of  $2\theta = 5-50^\circ$  on a Miniflex II diffractometer using a CuK $\alpha$  radiation. Thermogravimetric analysis (TGA) was carried out with a Mettler TGA/SDTA851<sup>o</sup> thermal analyzer at a heating rate of 10 °C·min<sup>-1</sup> under an atmosphere of flowing air on the pure powder samples from 30 to 800 °C. Gas adsorption measurement was performed in the ASAP (Accelerated Surface Area and Porosimetry) 2020 System. Vapor-phase adsorption isotherms were measured with an Intelligent Gravimetric Sorption Analyser IGA100B from the Hiden Corporation.

**Synthesis of Zn-CP.** The synthesis procedure can refer our previous work.<sup>1</sup> Typically, a mixture of 0.1 mmol pbpy·Cl<sub>2</sub> (0.049 g), 0.1 mmol H<sub>4</sub>PMC (0.025 g), 2 mL ZnSO<sub>4</sub> solution (0.05 M) and 3 mL DMF stirred for 20 min, then sealed in a 20 mL vial and kept at 110 °C for 40 h. The yellow laminar-like crystals of Zn-CP were obtained.

**The breakthrough measurements.** The as-made sample was degassed at 110 °C for 5 hours in vacuum prior to measurements. Breakthrough experiments were executed by applying the separation column packed with the activated sample. For CO<sub>2</sub>/CH<sub>4</sub>

breakthrough experiments, were executed by applying with about 760 mg activated sample was packed into the separation column with the length of 10 cm and an internal diameter of 6 mm, while the helium with a rate of 10 mL (STP) min<sup>-1</sup> kept flowing. The feed gases, binary CO<sub>2</sub>/CH<sub>4</sub> (50/50, v/v) mixtures, were supplied to this measurement with a flow rate of 1 mL (STP) min<sup>-1</sup> under 298 K and atmospheric pressure. The gas compositions at the outlet determined continuously by mass spectrometry (MS, MKS, CIRRUS-3). While for C<sub>2</sub>H<sub>2</sub>/C<sub>2</sub>H<sub>4</sub> breakthrough experiments, 500 mg sample was filled in the column with the length of 8 cm and an internal diameter of 4 mm, while the helium kept flowing with a rate of 5 mL (STP) min<sup>-1</sup>. The feed gases, binary C<sub>2</sub>H<sub>2</sub>/C<sub>2</sub>H<sub>4</sub> (50/50, v/v) mixtures, were supplied to this measurement with a flow rate of 4 mL (STP) min<sup>-1</sup> under 298 K and atmospheric pressure. The gas compositions at the outlet determined continuously by mass spectrometry (MS, Hiden, HPR-20).

### Isosteric Heat of Adsorption

A virial type expression of the following form was used to fit the combined isotherm data for a given material at 273 and 298 K.<sup>2</sup>

$$\ln P = \ln N + 1/T \sum_{i=0}^m a_i N^i + \sum_{j=0}^n b_j N^j$$

Here,  $P$  is the pressure,  $N$  is the adsorbed amount,  $T$  is the temperature,  $a_i$  and  $b_j$  are virial coefficients, and  $m$ ,  $n$  represents the number of coefficients required to adequately describe the isotherms. The values of the virial coefficients  $a_0$  through  $a_m$  were then used to calculate the isosteric heat of adsorption.

The coverage-dependent isosteric heat of adsorption ( $Q_{st}$ ):

$$Q_{st} = -R \sum_{i=0}^m a_i N^i$$

$R$  is the universal gas constant, 8.314 J·mol<sup>-1</sup>·K<sup>-1</sup>.

### Henry's law selectivity

To estimate reliable Henry's constants, a virial-type expression comprising the temperature-independent parameters  $a_i$  and  $b_j$  was applied:

$$\ln P = \ln N + 1/T \sum_{i=0}^m a_i N^i + \sum_{j=0}^n b_j N^j$$

Henry's constant ( $K_H$ ):

$$K_H = \exp(-b_0) \cdot \exp(-a_0/T)$$

The Henry's law selectivity for gas component  $i$  over  $j$  is calculated based on:

$$S_{ij} = K_{Hi} / K_{Hj}$$

### Adsorption selectivity base on IAST<sup>3</sup>

To better describe the single component adsorption isotherms, dual site Langmuir-Freundlich (DSLFF) model was used and well-defined as:

$$q = A_1 \frac{b_1 p^{1/c_1}}{1 + b_1 p^{1/c_1}} + A_2 \frac{b_2 p^{1/c_2}}{1 + b_2 p^{1/c_2}}$$

Here,  $q$  (mmol/g) is the adsorbed amount,  $A_1$  and  $A_2$  (mmol/g) are the saturated capacities of site 1 and site 2,  $b_1$  and  $b_2$  (1/kPa) are the affinity coefficients to the sites 1 and 2,  $P$  (kPa) is the pressure, and  $c_1$  and  $c_2$  represent the deviations from an ideal homogeneous surface. The adsorption selectivities were established using IAST combined with DSLFF to predict the selectivity of porous materials for binary gas.

The adsorption selectivity  $S_{ij}$  is defined as:

$$S_{ij} = \frac{x_i/x_j}{y_i/y_j}$$

Here,  $x_i$  and  $x_j$  are the gas uptake capacity at the adsorbed equilibrium of components  $i$  and  $j$  respectively. The gas molar fractions the  $i$  and  $j$  components are represented by  $y_i$  and  $y_j$ , respectively

### Density-Functional Theory Calculations

All spin-polarized calculations were performed using VASP<sup>4,5</sup> with PAW method.<sup>6,7</sup> The exchange-correlation energy was treated using GGA-PBE function.<sup>8</sup> A cutoff energy of 400 eV was set for the plane-wave expansion. The convergence criteria for the force and electronic self-consistent iteration were set to 0.05 eV/Å and  $10^{-4}$  eV, respectively. The bulk Zn-CP structure was fully relaxed. A Monkhorst-Pack method of k-points was used.<sup>9</sup> Binding energy of adsorbent ( $C_2H_2$ ,  $C_2H_4$ , and  $CO_2$ ) is defined as:

$$E_{binding} = E_{x/Zn-CP} - [E_{Zn-CP} + E_x]$$

Here,  $E_{x/Zn-CP}$ ,  $E_{Zn-CP}$  and  $E_x$  are the total energy of the **Zn-CP** with adsorbents, the clean **Zn-CP** and the free adsorbent ( $x$ ) in gas phase, respectively.

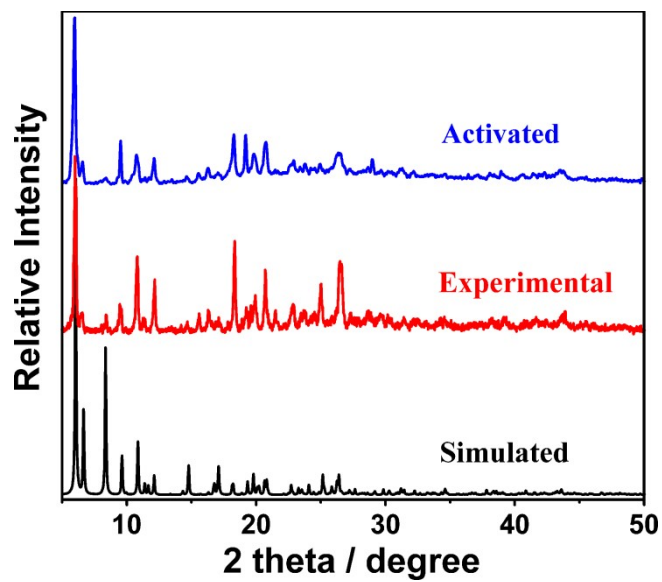

Fig. S1 PXRD patterns of Zn-CP before and after being activated.

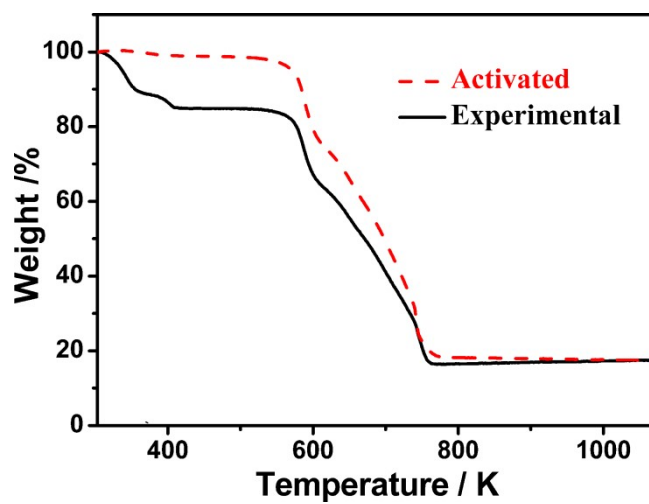

Fig. S2 TG curves for the as-synthesized Zn-CP and the activated sample.

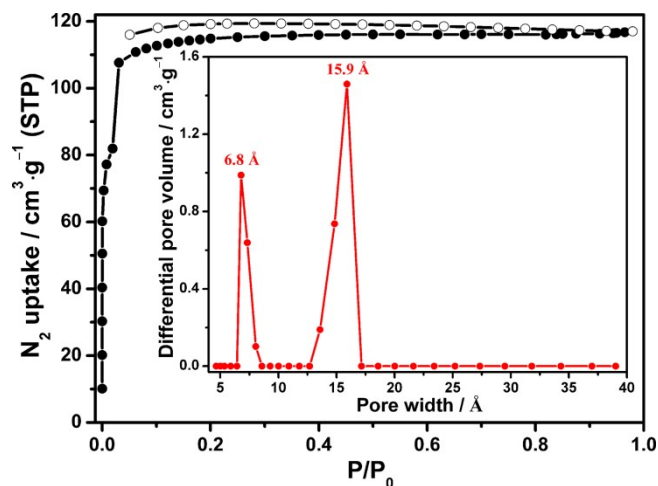

**Fig. S3** N<sub>2</sub> adsorption (closed symbols) and desorption (open symbols) isotherms at 77 K. The inset shows the pore size distribution calculated by the DFT (density functional theory) method. STP stands for standard temperature and pressure.

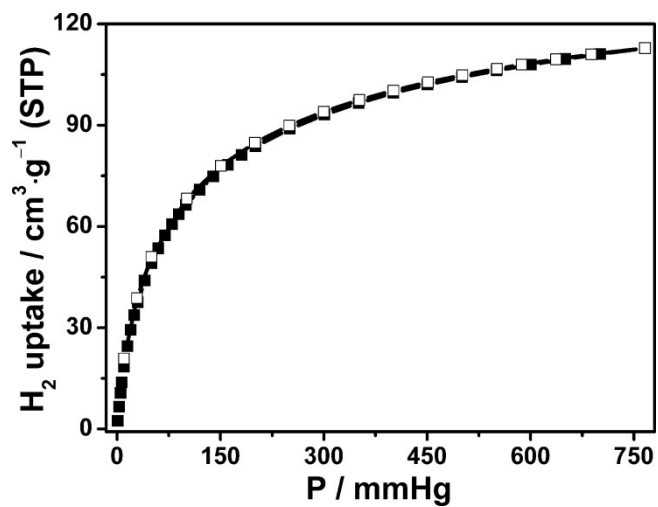

**Fig. S4** H<sub>2</sub> adsorption (closed symbols) and desorption (open symbols) isotherms at 77 K.

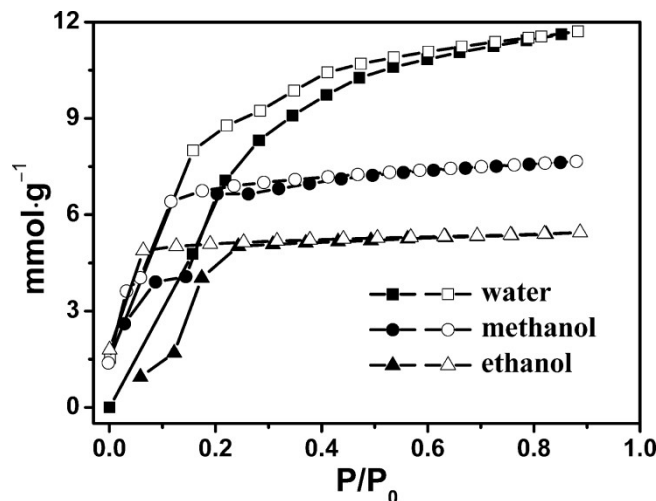

Fig. S5 The vapor adsorption (closed symbols) and desorption (open symbols) isotherms.

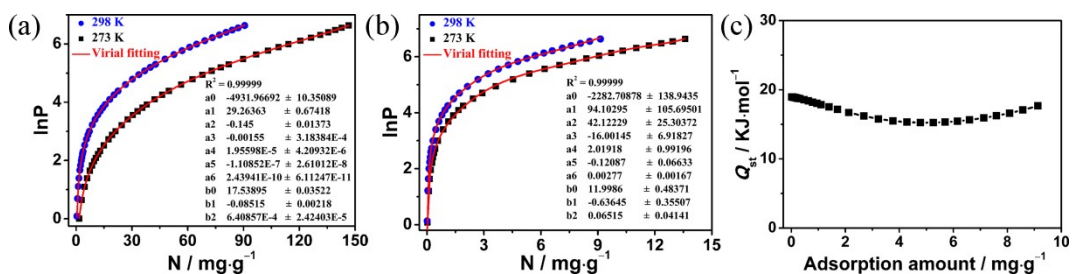

Fig. S6 Fitted  $\text{CO}_2$  (a) and  $\text{CH}_4$  (b) adsorption isotherms; (c) isosteric heat of  $\text{CH}_4$  adsorption.

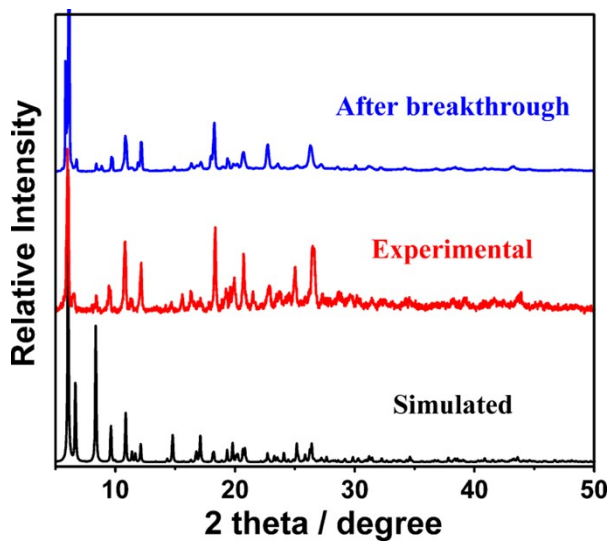

Fig. S7 PXRD patterns of  $\text{Zn-CP}$  before and after the  $\text{CO}_2/\text{CH}_4$  (50/50, v/v) breakthrough experiments.

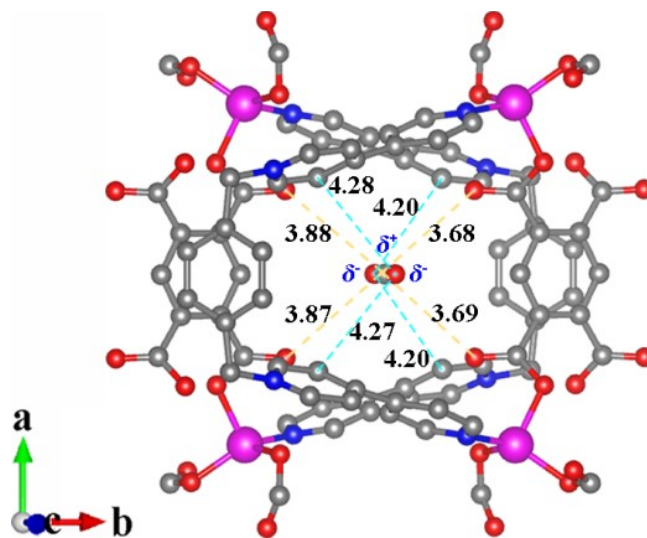

**Fig. S8** DFT optimized geometry for CO<sub>2</sub> located in the channel of **Zn-CP** ( $E_{\text{binding}} = -1.16$  eV). Close contact distances (in Å) are marked. Magenta, gray, blue and red represent Zn, C, N and O atoms, respectively.

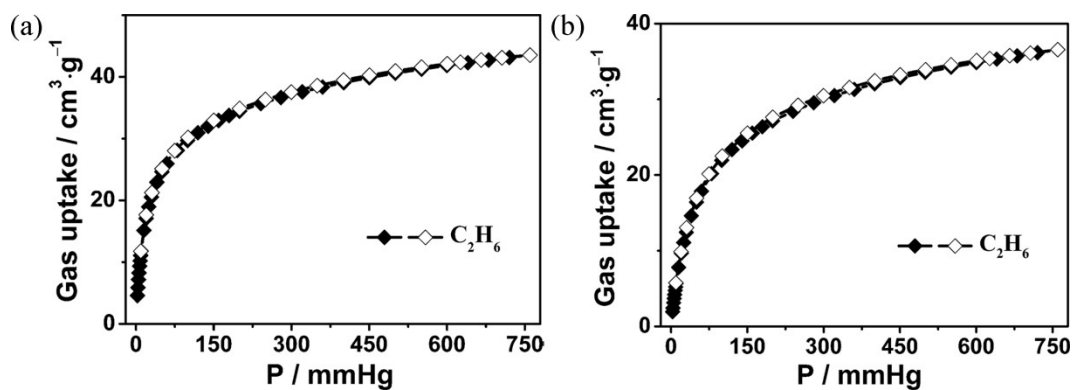

**Fig. S9** C<sub>2</sub>H<sub>6</sub> adsorption (closed symbols) and desorption (open symbols) isotherms at 273 K (a) and 297 K (b), respectively.

Under 1 bar, the maximum uptakes of C<sub>2</sub>H<sub>6</sub> are 43.5 and 36.6 cm<sup>3</sup>·g<sup>-1</sup> measured at 273 K and 298 K, respectively.

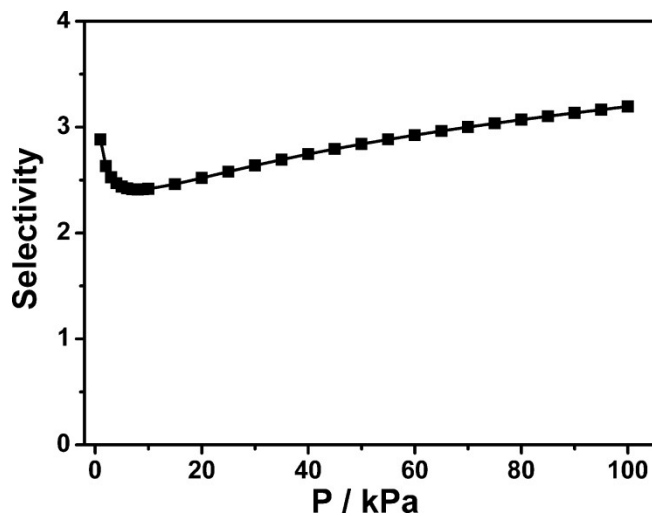

Fig. S10 IAST predicted  $C_2H_2/C_2H_4$  (50/50, v/v) selectivity at 298 K.

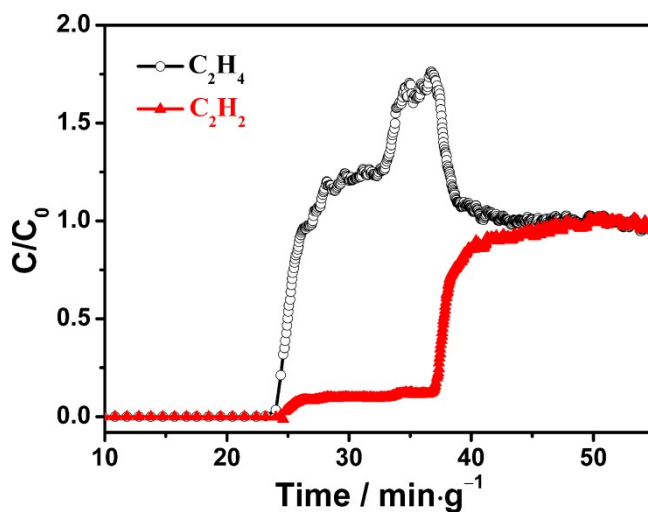

Fig. S11 Experimental column breakthrough curves for  $C_2H_2/C_2H_4$  (50/50, v/v) separation with **Zn-CP** at 298 K and 1 bar.

The breakthrough curves present a “roll-up” before  $C_2H_4$  breakthrough occurs completely, indicating that the flow rate temporarily exceeds the feed flow rate. For **Zn-CP**, the roll-up might be attributed to the desorption of  $C_2H_4$  within the pore structures induced by  $C_2H_2$ .<sup>10</sup>



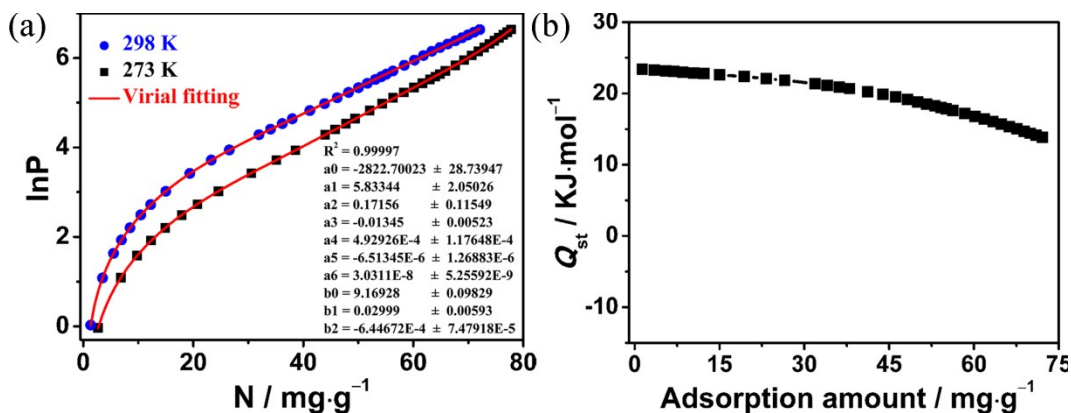

Fig. S12 (a) Fitted  $C_2H_2$  adsorption isotherms; (b) isosteric heat of  $C_2H_2$  adsorption.

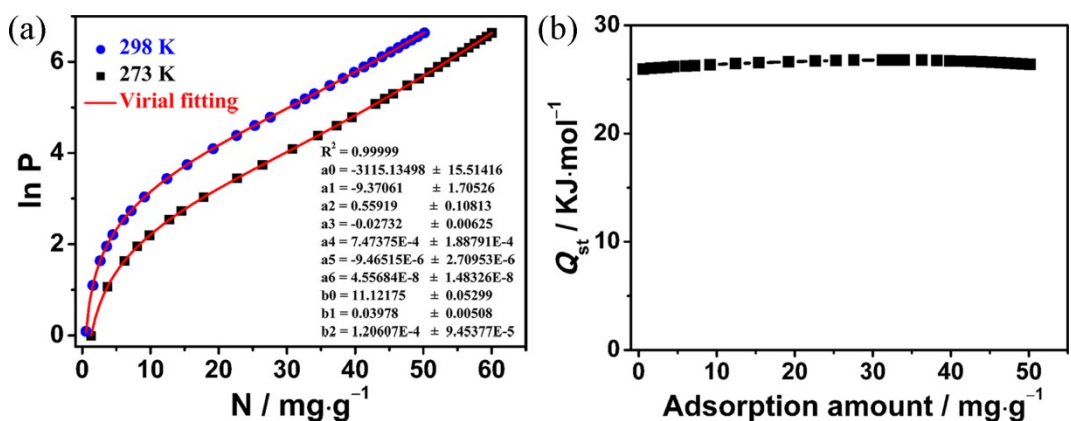

Fig. S13 (a) Fitted  $C_2H_4$  adsorption isotherms; (b) isosteric heat of  $C_2H_4$  adsorption.

The  $Q_{st}$  values of  $C_2H_2$  and  $C_2H_4$  at zero coverage are calculated to be 23.4 and 25.9  $kJ \cdot mol^{-1}$ , respectively (Figs. S12-13). The  $C_2H_2$   $Q_{st}$  value is comparable to those of the reported CPs with functional amine groups UTSA-100a (22  $kJ \cdot mol^{-1}$ ),<sup>11</sup> cyclodextrin-based CD-MOF-2 (25.8  $kJ \cdot mol^{-1}$ )<sup>12</sup> and M'MOF-3a (27.3  $kJ \cdot mol^{-1}$ ).<sup>13</sup> The relatively low adsorption heat facilitates for the regeneration of  $C_2H_2$  from **Zn-CP** by avoiding the high energy consumption. Although the adsorption heat of  $C_2H_2$  was slightly lower than that of  $C_2H_4$ , due to the pore environment to form the distinct intermolecular H-bond interaction, **Zn-CP** exhibits higher uptake for  $C_2H_2$  over  $C_2H_4$ .<sup>14</sup>

**Table S1.** CO<sub>2</sub>/CH<sub>4</sub> separation selectivities calculated by Henry's law and IAST methods at 298 K.

| Adsorbate       | Henry's law selectivity |           |             | IAST selectivity (1 atm) |          |
|-----------------|-------------------------|-----------|-------------|--------------------------|----------|
|                 | $K_H$                   | $a_0$     | $b_0$       | $S_{ij}^*$               | $S_{ij}$ |
| CO <sub>2</sub> | 0.37                    | -4932±10  | 17.54±0.035 | /                        | /        |
| CH <sub>4</sub> | 0.013                   | -2283±139 | 11.99±0.48  | 28.5                     | 8.8      |

\* The Henry's law selectivities  $S_{ij}^*$  for gas component CO<sub>2</sub> over CH<sub>4</sub> at the speculated temperatures are calculated based on equation:  $S_{ij}^* = K_H(\text{CO}_2)/K_H(\text{CH}_4)$ .

**Table S2.** Summary of the adsorption data for C<sub>2</sub>H<sub>2</sub> and C<sub>2</sub>H<sub>4</sub> in various PCPs.

| CPs          | $S_{\text{BET}}$<br>(m <sup>2</sup> ·g <sup>-1</sup> ) <sup>a</sup> | C <sub>2</sub> H <sub>2</sub> uptake<br>(mmol·g <sup>-1</sup> ) | C <sub>2</sub> H <sub>4</sub> uptake<br>(mmol·g <sup>-1</sup> ) | C <sub>2</sub> H <sub>2</sub> /C <sub>2</sub> H <sub>4</sub><br>uptake ratio <sup>f</sup> | IAST<br>selectivity | Ref              |
|--------------|---------------------------------------------------------------------|-----------------------------------------------------------------|-----------------------------------------------------------------|-------------------------------------------------------------------------------------------|---------------------|------------------|
| FeMOF-74     | 1350                                                                | 6.8 <sup>c</sup>                                                | 6.1 <sup>c</sup>                                                | 1.11                                                                                      | 1.87                | 15,16            |
| MgMOF-74     | 927                                                                 | 8.37 <sup>d</sup>                                               | 7.45 <sup>d</sup>                                               | 1.12                                                                                      | 2.18                | 15,16            |
| CoMOF-74     | 1018                                                                | 8.17                                                            | 7.02                                                            | 1.16                                                                                      | 1.70                | 15,16            |
| ZJNU-14      | 883                                                                 | 4.00                                                            | 3.25                                                            | 1.23                                                                                      | 1.63                | 17               |
| Ni-DCPTP     | 857                                                                 | 6.54                                                            | 4.48                                                            | 1.46                                                                                      | 5.5                 | 18               |
| NOTT-300     | 1370                                                                | 6.34 <sup>e</sup>                                               | 4.28 <sup>e</sup>                                               | 1.48                                                                                      | 2.30                | 19               |
| <b>Zn-CP</b> | <b>367</b>                                                          | <b>2.77</b>                                                     | <b>1.79</b>                                                     | <b>1.55</b>                                                                               | <b>3.20</b>         | <b>This work</b> |
| CPL-5        | 523 <sup>b</sup>                                                    | 3.01                                                            | 1.84                                                            | 1.64                                                                                      | 5.99                | 20               |

Summary of the adsorption data were collected at 298 K. <sup>a</sup> $S_{\text{BET}}$  (Brunauer-Emmett-Teller specific surface area) calculated from N<sub>2</sub> isotherms at 77 K. <sup>b</sup> $S_{\text{BET}}$  calculated from CO<sub>2</sub> isotherms at 195~196 K. <sup>c</sup>318 K. <sup>d</sup>296 K. <sup>e</sup>293 K. <sup>f</sup>For ratios of the total uptake capacities at 1 bar.

## References

- 1 B. Tan, C. Chen, L. X. Cai, Y. J. Zhang, X. Y. Huang and J. Zhang, Introduction of Lewis Acidic and Redox-Active Sites into a Porous Framework for Ammonia Capture with Visual Color Response, *Inorg. Chem.*, 2015, **54**, 3456-3461.
- 2 J. L. C. Rowsell and O. M. Yaghi, Effects of Functionalization, Catenation, and Variation of the Metal Oxide and Organic Linking Units on the Low-Pressure Hydrogen Adsorption Properties of Metal-Organic Frameworks, *J. Am. Chem. Soc.*, 2006, **128**, 1304-1315.
- 3 A. L. Myers and J. M. Prausnitz, Thermodynamics of mixed-gas adsorption, *AIChE J.*, 1965, **11**, 121-127.

- 4 G. Kresse and J. Furthmüller, Efficiency of ab-initio total energy calculations for metals and semiconductors using a plane-wave basis set, *Comp. Mater. Sci.*, 1996, **6**, 15-50.
- 5 G. Kresse and J. Furthmüller, Efficient iterative schemes for *ab initio* total-energy calculations using a plane-wave basis set, *Phys. Rev. B*, 1996, **54**, 11169-11186.
- 6 P. E. Blöchl, Projector augmented-wave method, *Phys. Rev. B*, 1994, **50**, 17953-17979.
- 7 G. Kresse and D. Joubert, From ultrasoft pseudopotentials to the projector augmented-wave method, *Phys. Rev. B*, 1999, **59**, 1758-1775.
- 8 J. P. Perdew, K. Burke and M. Ernzerhof, Generalized Gradient Approximation Made Simple, *Phys. Rev. Lett.*, 1996, **77**, 3865-3868.
- 9 H. J. Monkhorst and J. D. Pack, Special points for Brillouin-zone integrations, *Phys. Rev. B*, 1976, **13**, 5188-5192.
- 10 P.-D. Zhang, X.-Q. Wu, T. He, L.-H. Xie, Q. Chen and J.-R. Li, Selective adsorption and separation of C<sub>2</sub> hydrocarbons in a "flexible-robust" metal-organic framework based on a guest-dependent gate-opening effect, *Chem. Commun.*, 2020, **56**, 5520-5523.
- 11 T.-L. Hu, H. L. Wang, B. Li, R. Krishna, H. Wu, W. Zhou, Y. F. Zhao, Y. Han, X. Wang, W. D. Zhu, Z. Z. Yao, S. C. Xiang and B. L. Chen, Microporous metal-organic framework with dual functionalities for highly efficient removal of acetylene from ethylene/acetylene mixtures, *Nat. Commun.*, 2015, **6**, 7328.
- 12 L. Y. Li, J. W. Wang, Z. G. Zhang, Q. W. Yang, Y. W. Yang, B. G. Su, Z. B. Bao and Q. L. Ren, Inverse Adsorption Separation of CO<sub>2</sub>/C<sub>2</sub>H<sub>2</sub> Mixture in Cyclodextrin-Based Metal-Organic Frameworks, *ACS Appl. Mater. Interfaces*, 2019, **11**, 2543-2550.
- 13 S.-C. Xiang, Z. J. Zhang, C.-G. Zhao, K. L. Hong, X. B. Zhao, D.-R. Ding, M.-H. Xie, C.-D. Wu, M. C. Das, R. Gill, K. M. Thomas and B. L. Chen, Rationally tuned micropores within enantiopure metal-organic frameworks for highly selective separation of acetylene and ethylene, *Nat. Commun.*, 2011, **2**, 204.
- 14 X. L. Cui, K. J. Chen, H. B. Xing, Q. W. Yang, R. Krishna, Z. B. Bao, H. Wu, W. Zhou, X. L. Dong, Y. Han, B. Li, Q. L. Ren, M. J. Zaworotko and B. L. Chen, Pore chemistry and size control in hybrid porous materials for acetylene capture from ethylene, *Science*, 2016, **353**, 141-144.
- 15 E. D. Bloch, W. L. Queen, R. Krishna, J. M. Zadrozny, C. M. Brown and J. R. Long, Hydrocarbon Separations in a Metal-Organic Framework with Open Iron(II) Coordination Sites, *Science*, 2012, **335**, 1606-1610.
- 16 S. J. Geier, J. A. Mason, E. D. Bloch, W. L. Queen, M. R. Hudson, C. M. Brown and J. R. Long, Selective adsorption of ethylene over ethane and propylene over propane in the metal-organic frameworks M<sub>2</sub>(dobdc) (M = Mg, Mn, Fe, Co, Ni, Zn), *Chem. Sci.*, 2013, **4**, 2054-2061.
- 17 Z. Z. Jiang, L. H. Fan, P. Zhou, T. T. Xu, J. X. Chen, S. M. Hu, D.-L. Chen and Y. B. He, An N-oxide-functionalized nanocage-based copper-tricarboxylate framework for the selective capture of C<sub>2</sub>H<sub>2</sub>, *Dalton Trans.*, 2020, **49**, 15672-15281.
- 18 H.-H. Wang, Q.-Y. Liu, L. B. Li, R. Krishna, Y.-L. Wang, X.-W. Peng, C.-T. He, R.-B. Lin and B. L. Chen, Nickel-4'-(3,5-dicarboxyphenyl)-2,2',6',2''-terpyridine Framework: Efficient Separation of Ethylene from Acetylene/Ethylene Mixtures with a High Productivity, *Inorg. Chem.*, 2018, **57**, 9489-9494.
- 19 S. H. Yang, A. J. Ramirez-Cuesta, R. Newby, V. Garcia-Sakai, P. Manuel, S. K. Callear, S. I. Campbell, C. C. Tang and M. Schröder, Supramolecular binding and separation of hydrocarbons within a functionalized porous metal-organic framework, *Nat. Chem.*, 2015, **7**, 121-129.
- 20 F. Zheng, L. D. Guo, B. X. Gao, L. Y. Li, Z. G. Zhang, Q. W. Yang, Y. W. Yang, B. G. Su, Q. L. Ren and Z. B. Bao, Engineering the Pore Size of Pillared-Layer Coordination Polymers Enables Highly Efficient Adsorption Separation of Acetylene from Ethylene, *ACS Appl. Mater. Interfaces*, 2019, **11**, 28197-28204.
